# Supplementary material for: Capture of [Bi4]6− and [Bi3]5− anions by [Rh(L)]+ (L = COD) cations in the closo heteroatomic clusters {Bi4[Rh(L)]4}2− and {Bi3[Rh(L)]3}2−
Source: Royal Society of Chemistry journal article supplement (doi:10.1039/d2nj05883a), 2023-01-01
Supplement: d2nj05883a1.pdf [file d2nj05883a1.pdf]

## Supporting Information

### Capture of $[\text{Bi}_4]^{6-}$ and $[\text{Bi}_3]^{5-}$ Anions by $[\text{Rh}(\text{L})]^+$ (L=COD) Cations in the *closo* Heteroatomic Clusters $\{\text{Bi}_4[\text{Rh}(\text{L})_4]^{2-}$ and $\{\text{Bi}_3[\text{Rh}(\text{L})_3]^{2-}$

Zhibing Liang, lifang Lin, Yuanwei Liang\*, Yi Wang\*

E-mail: liangyw@gdou.edu.cn; ywangcm@gmail.com

#### 1. Experimental Procedures

All reactions were performed under an inert atmosphere of dry nitrogen or argon in a dry box (Vacuum Atmospheres Co) or using standard Schlenk techniques. Melts of a Zintl phase of nominal composition  $\text{K}_5\text{Bi}_4$  were prepared by fusion ( $\sim 1100^\circ\text{C}$ ) of stoichiometric ratios of the corresponding elements. **Caution: Synthesis of Zintl phases is highly exothermic. Full personal protective equipment and blast shields should be used at all times!** Ethylenediamine was purified via long-path distillation over sodium metal. Other solvents were purified by distillation from sodium benzophenone ketyl radical under a dinitrogen atmosphere.  $\text{Rh}(\text{COD})(\text{Acac})(\text{COD}= 1,5\text{-cyclooctadiene, Acac}= \text{acetylacetonate})$  and  $\text{Rh}(\text{COD})(\text{Cp})(\text{Cp}= \text{cyclopentadienyl})$  were synthesized according to the literature.<sup>[1]</sup> 1,4,7,10,13,16-Hexaoxacyclooctadecane (18-crown-6 ether, >98%, TCI America) and 4,7,13,16,21,24-Hexaoxa-1,10-diazabicyclo[8.8.8]hexacosane(2,2,2-crypt, >98%, Acros Organic) were used as received. Negative ion mode electrospray ionization mass spectrometry (ESI-MS) experiments were carried out on the  $\text{CH}_3\text{CN}$  solution of the according crystal samples through a JEOL AccuTOF-CS MS spectrometer with source temperature of  $100^\circ\text{C}$ , desolvation temperature of  $200^\circ\text{C}$ , capillary voltage of 2.1 kV and cone voltage of 65V. The samples were prepared in an  $\text{N}_2$ -filled glovebox and introduced into the spectrometer through a 2.5 ml air-tight syringe. Energy dispersive X-ray spectroscopy (EDX) analysis was performed on Hitachi SU-70 SEM, operated at an acceleration voltage of 25 keV (**Note:** EDX is only a semiquantitative analysis method, which usually can't give the accurate ratio of elements. Deviations are rather common in the EDX characterization of Zintl clusters which can be ascribed to the irregular surfaces of the crystals after exposure to air.). Data acquisition was performed with an accumulation time of 180s. All the NMR experiment was performed on a Bruker AV-400 MHz spectrometer at room temperature.  $^1\text{H}$  NMR and  $^{13}\text{C}$  NMR spectra were calibrated to residual  $^1\text{H}$  and  $^{13}\text{C}$  chemical shifts of acetonitrile- $d_3$ , respectively.

**Synthesis of  $[\text{K}(18\text{-crown-6})]_2\{\text{Bi}_4[\text{Rh}(\text{COD})]_4\} \cdot 2\text{en} \cdot 2\text{tol}$**  182.0mg (1.76mmol) of " $\text{K}_5\text{Bi}_4$ " and 228.5 mg (8.65mmol) of 18-Crown-6 were weighed out into a 10 mL scintillation vial. Then *ca.* 7mL of ethylenediamine was added. The reaction mixture was stirred for 30 min, resulting in a blue-green solution, into which  $\text{Rh}(\text{COD})(\text{acac})$  (46.3mg, 1.49mmol) was added as solids. The reaction mixture was

stirred at room temperature for 2h. The resulting dark brown red solution were filtered through glass wool and transferred into a test tube (12×75mm) and then carefully layered with **6ml** toluene. After about ten days, large black block-like crystals of  $[K(18\text{-crown-6})]_2[Bi_4[Rh(COD)]_4] \cdot 2en \cdot 2tol$  were high reproducibly obtained in approximately 16% yield based on the precursor  $Rh(COD)(acac)$  used.

**Synthesis of  $[K(2,2,2\text{-crypt})]_2[Bi_3[Rh(COD)]_3] \cdot 0.5en$**  In a vial, precursor with the nominal composition  $K_5Bi_4$  (103.1mg, 0.1mmol) and 2,2,2-crypt (112.2 mg, 0.3mmol) were added into 2ml ethylenediamine (en), a blue-green solution was resulted after stirring at room temperature for 30 min.  $Rh(COD)(Cp)$  (20.7mg, 0.075mmol) was then added into the vial above as solid. The solution mixtures were then stirred at room temperature for 2h, resulting in a brown-red solution, the reaction mixture was then filtered through tightly packed glass wool. The filtrate was layered with another 3ml toluene. After about a week, small black needle-like crystals of  $[K(2,2,2\text{-crypt})]_2[Bi_3[Rh(COD)]_3] \cdot 0.5en$  were observed in the bottle of the tube, with a yield of 23% based on the transition metal complex  $Rh(COD)(Cp)$  used.

**X-ray crystal-structure determination (1).  $[K(18\text{-crown-6})]_2[Bi_4[Rh(COD)]_4] \cdot 2en \cdot 2tol$  (GDOU01)** A suitable single crystal was selected and measured on a Bruker Smart Apex II CCD diffractometer [2]. The crystal was kept at 150(2) K during data collection. The integral intensity were correct for absorption using SADABS software [3] using multi-scan method. Resulting minimum and maximum transmission are 0.108 and 0.196 respectively. The structure was solved with the ShelXT-2014 (Sheldrick, 2015a) [4] program and refined with the ShelXL-2015 (Sheldrick, 2015c) [5] program and least-square minimisation using ShelX software package [6]. Number of restraints used = 1130. 1 of 2  $[K(18\text{-crown-6})]^+$  ions and en solvent molecules binding K-crown ions are disordered in 2 alternative orientations and therefore were refined with geometry restrained to be similar and atomic displacement parameters to correspond to rigid body motions and to be similar as well. H atoms were positioned from geometric considerations and refined as riding on the attached atoms with Uiso constrained to be 20% (50% for methyl group) larger than Ueqv of the attached atom. Orientation of methyl groups was optimized.

(2).  **$[K(2,2,2\text{-crypt})]_2[Bi_3[Rh(COD)]_3] \cdot 0.5en$**  A suitable single crystals of  $C_{61}H_{112}Bi_3K_2N_5O_{12}Rh_3$  (GDOU02) was selected and measured on a Pulatus 1M diffractometer [2]. The crystal was kept at 150(2) K during data collection. The integral intensity was correct for absorption using SADABS software [3] using multi-scan method. Resulting minimum and maximum transmission are 0.3586 and 0.4235 respectively. The structure was solved with the ShelXT (Sheldrick, 2015a) [4] program and refined with the ShelXL (Sheldrick, 2015c) [5] program and least-square minimisation using ShelX software package [6]. Number of restraints used = 13.

## References:

1. J. Chatt and L. M. Venanzi, *J. Chem. Soc.*, 1957, **744**, 4735– 4741.
2. Bruker (2010). Apex2. Bruker AXS Inc., Madison, Wisconsin, USA.
3. Krause, L., Herbst-Irmer, R., Sheldrick, G.M., Stalke, D. (2015). *J. Appl. Cryst.* 48, 3-10.
4. Sheldrick, G. M. (2015a). *Acta Cryst.* A17, 3-8.
5. Sheldrick, G. M. (2015c). *Acta Cryst.* C17, 3-8.
6. Dolomanov, O.V., Bourhis, L.J., Gildea, R.J, Howard, J.A.K. & Puschmann, H. (2009), *J. Appl. Cryst.* 42, 339-341.

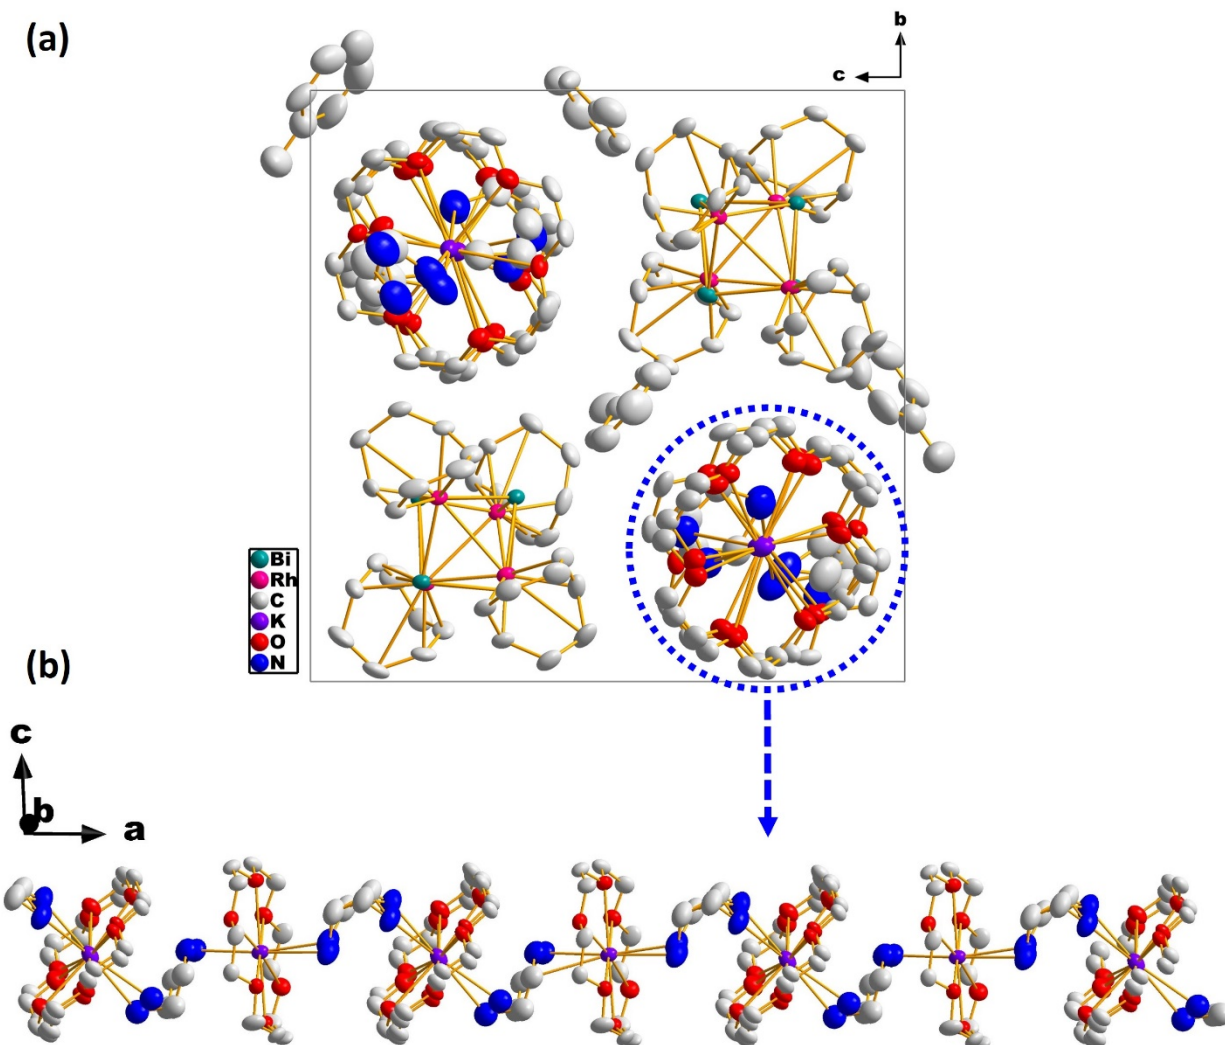

**Figure S1** Crystal structure of the salt  $[K(18\text{-crown-}6)]_2[Bi_4[Rh(COD)]_4] \cdot 2en \cdot 2tol$ : (a) the unit cell structure, (b) the  ${}^{\infty}_1[-en - [K(18crown6)] - en - ]_+$  one dimension chain, with thermal ellipsoids drawn at 50% probability and hydrogen atoms omitted for clarity.

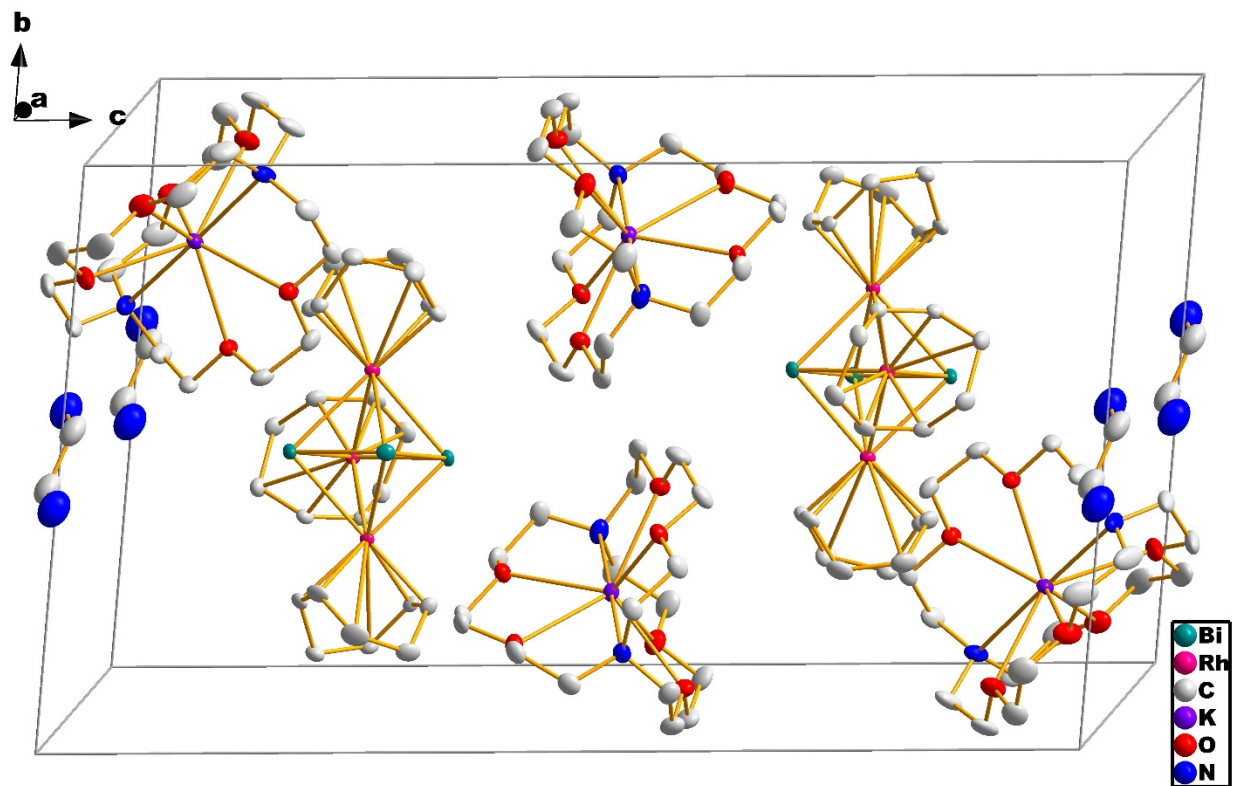

**Figure S2.** The unit cell structure of the salt of  $[K(2,2,2\text{-crypt})]_2[Bi_3[Rh(COD)]_3] \cdot 0.5en$  with thermal ellipsoids drawn at 50% probability and hydrogen atoms omitted for clarity.

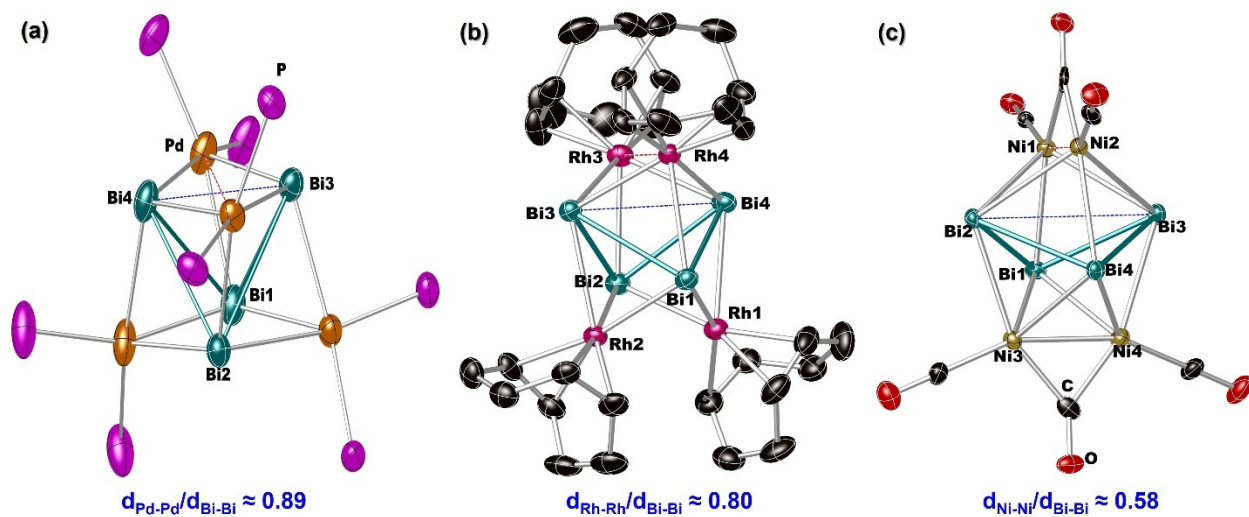

**Figure S3** Crystal structure of cluster anions (a)  $[\text{Bi}_4\text{Pd}_4(\text{PPh}_2\text{Me})_8]^{2+}$  where the  $\text{PPh}_2\text{Me}$  ligand was denoted by the P atom, (b)  $\{\text{Bi}_4[\text{Rh}(\text{COD})]_4\}^{2-}$  and (c)  $[\text{Bi}_4\text{Ni}_4(\text{CO})_6]^{2-}$  with thermal ellipsoid set at 50% probability level.

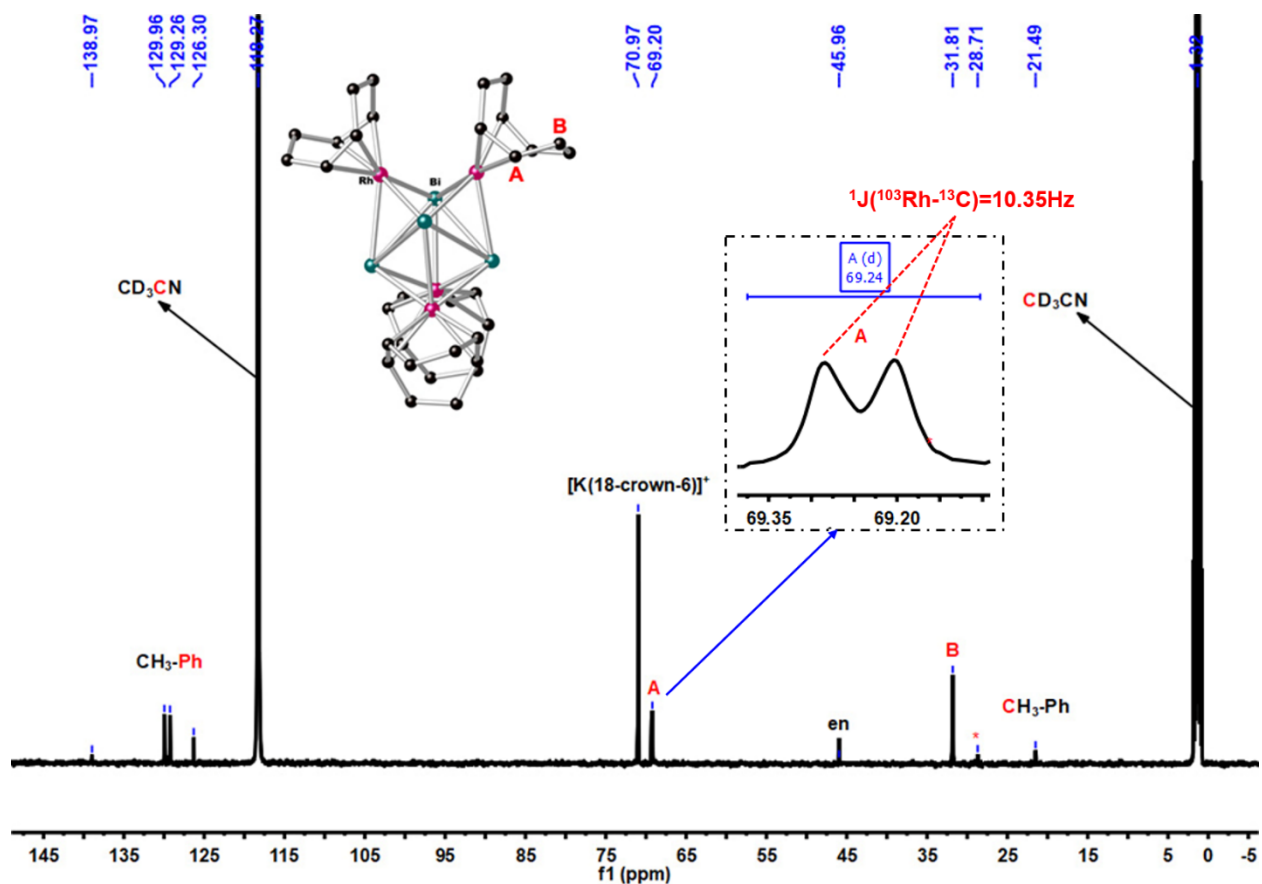

**Figure S4**  $^{13}\text{C}$  NMR of the crystal of the anion  $\{\text{Bi}_4[\text{Rh}(\text{COD})]_4\}^{2-}$  in  $\text{CD}_3\text{CN}$ , in which the Rh-C couplings with  $^1J(^{103}\text{Rh-}^{13}\text{C}) = 10.35\text{ Hz}$  were observed.

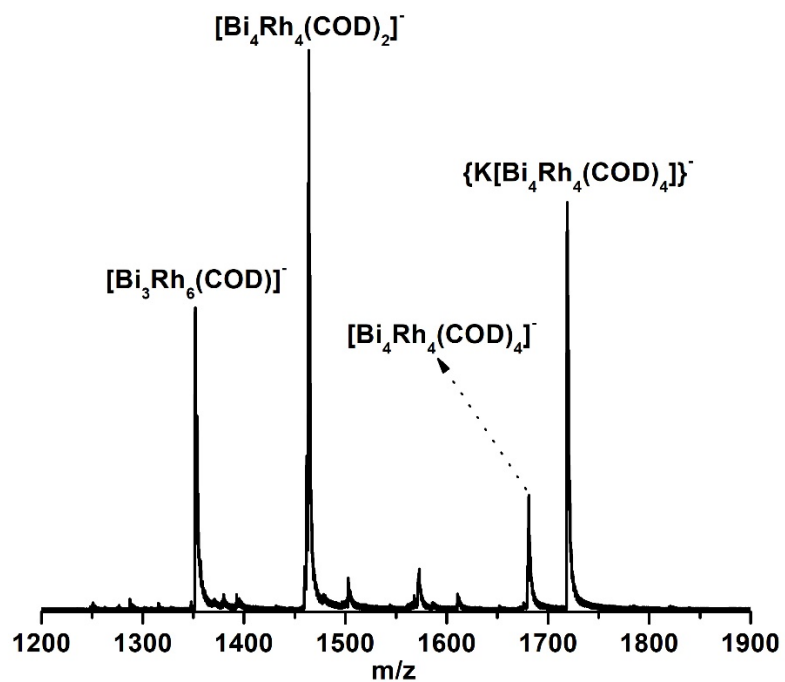

**Figure S5** ESI-MS of the crystal sample of the cluster anion  $\{Bi_4[Rh(COD)]_4\}^{2-}$  in  $CH_3CN$  in negative ion mode.

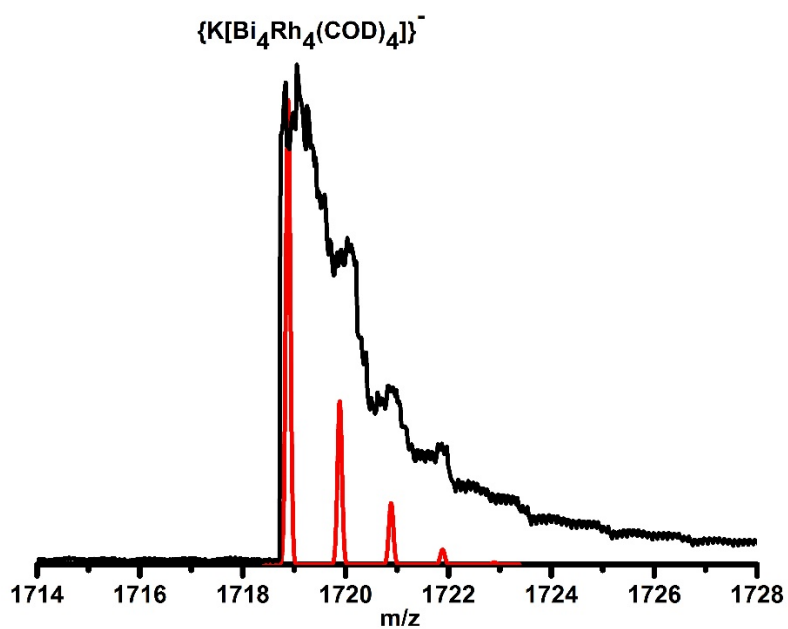

**Figure S6** Measured (black) and simulated (red) spectra of the  $\{K[Bi_4[Rh(COD)]_4]\}^-$  anion.

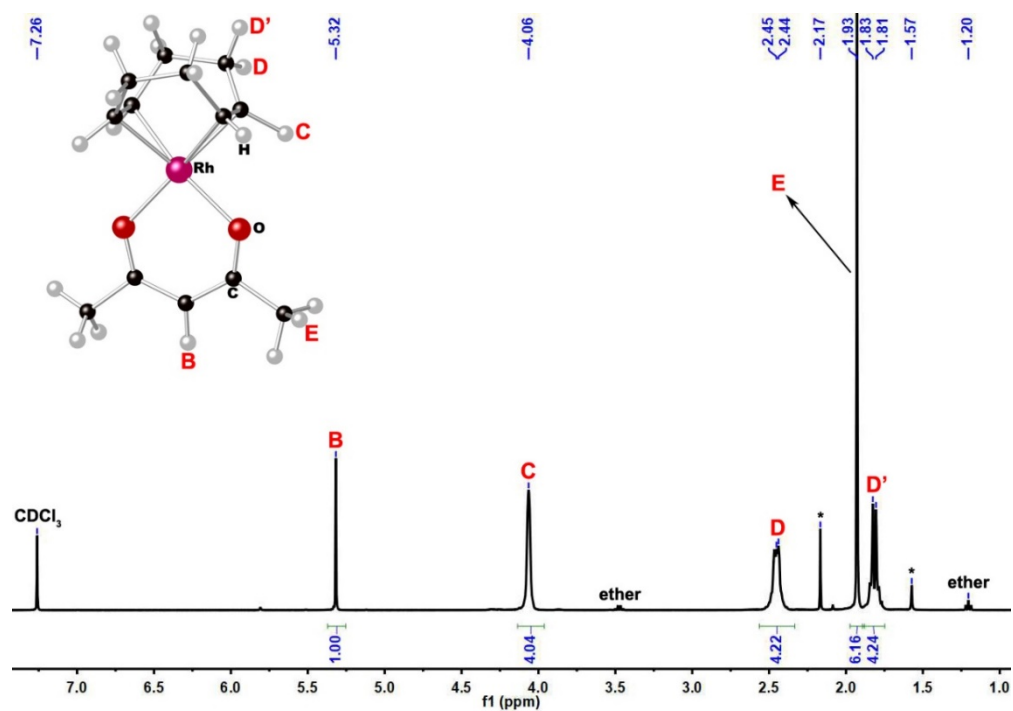

Figure S7  $^1\text{H}$  NMR of  $\text{Rh}(\text{COD})(\text{Acac})$  in  $\text{CDCl}_3$  at room temperature, with all H atoms being labeled.

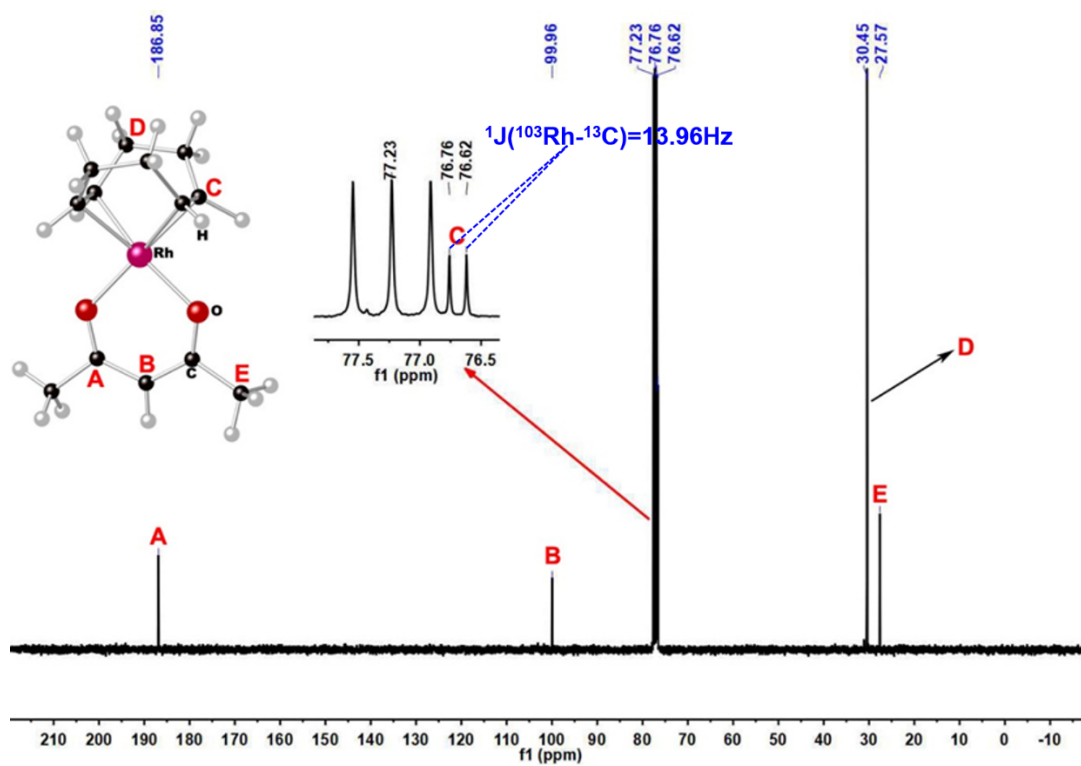

**Figure S8**  $^{13}\text{C}$  NMR of  $\text{Rh}(\text{COD})(\text{Acac})$  in  $\text{CDCl}_3$  at room temperature, with all C atoms being labeled and the Rh-C couplings  $^1J(^{103}\text{Rh}-^{13}\text{C})=13.96\text{Hz}$ .

**Table S1** Selected bond distances and bond angles of the cluster anion  $\{\text{Bi}_4[\text{Rh}(\text{COD})]_4\}^{2-}$  (1).

| <b>Bond distances (Å)</b> |            |             |             |             |            |             |            |
|---------------------------|------------|-------------|-------------|-------------|------------|-------------|------------|
| Bi1-Rh2                   | 2.7012(8)  | Bi- Rh1     | 2.7420(8)   | Bi1-Rh4     | 2.9117(8)  | Bi2-Rh1     | 2.7170(8)  |
| Bi2-Rh2                   | 2.7362(8)  | Bi2-Rh3     | 2.9552(8)   | Bi3-Rh4     | 2.7196(8)  | Bi3-Rh3     | 2.7292(7)  |
| Bi3-Rh2                   | 2.9373(7)  | Bi4-Rh3     | 2.7082(8)   | Bi4-Rh4     | 2.7419(7)  | Bi4-Rh1     | 2.9116(8)  |
| Bi1-Bi4                   | 3.1663(5)  | Bi1-Bi3     | 3.2693(4)   | Bi2-Bi3     | 3.1620(4)  | Bi2-Bi4     | 3.2289(5)  |
| Rh1-Rh2                   | 3.0798(10) | Rh3-Rh4     | 3.0607(10)  |             |            |             |            |
| Rh1-C14                   | 2.155(9)   | Rh1-C18     | 2.158(10)   | Rh1-C11     | 2.181(9)   | Rh1-C15     | 2.183(10)  |
| Rh2-C25                   | 2.154(9)   | Rh2-C21     | 2.167(9)    | Rh2-C28     | 2.170(10)  | Rh2-C24     | 2.182(8)   |
| Rh3-C38                   | 2.170(10)  | Rh3-C34     | 2.179(9)    | Rh3-C35     | 2.183(9)   | Rh3-C31     | 2.190(10)  |
| Rh4-C44                   | 2.136(10)  | Rh4-C48     | 2.158(9)    | Rh4-C45     | 2.176(11)  | Rh4-C41     | 2.190(9)   |
| C11-C18                   | 1.413(14)  | C14-C15     | 1.403(15)   | C31-C38     | 1.386(16)  | C34-C35     | 1.420(15)  |
| C41-C48                   | 1.407(13)  | C44-C45     | 1.372(15)   | C21-C28     | 1.394(13)  | C24-C25     | 1.403(13)  |
| <b>Bond angles (°)</b>    |            |             |             |             |            |             |            |
| Rh2-Bi-Rh1                | 68.91(2)   | Rh2-Bi1-Rh4 | 109.18(2)   | Rh1-Bi1-Rh4 | 110.47(2)  | Rh2-Bi1-Bi4 | 99.590(19) |
| Rh1-Bi1-Bi4               | 58.523(18) | Rh4-Bi1-Bi4 | 53.432(15)  | Rh2-Bi1-Bi3 | 58.008(16) | Rh1-Bi1-Bi3 | 97.357(18) |
| Rh4-Bi1-Bi3               | 51.814(16) | Bi4-Bi1-Bi3 | 73.056(11)  | Rh1-Bi2-Rh2 | 68.77(2)   | Rh1-Bi2-Rh3 | 108.89(2)  |
| Rh2-Bi2-Rh3               | 110.29(2)  | Rh1-Bi2-Bi3 | 100.471(18) | Rh2-Bi2-Bi3 | 59.211(16) | Rh3-Bi2-Bi3 | 52.863(15) |
| Rh1-Bi2-Bi4               | 57.875(18) | Rh2-Bi2-Bi4 | 97.346(18)  | Rh3-Bi2-Bi4 | 51.712(17) | Bi3-Bi2-Bi4 | 73.664(11) |
| Rh4-Bi3-Rh3               | 68.35(2)   | Rh4-Bi3-Rh2 | 107.92(2)   | Rh3-Bi3-Rh2 | 111.02(2)  | Rh4-Bi3-Bi2 | 99.507(18) |
| Rh3-Bi3-Bi2               | 59.678(17) | Rh2-Bi3-Bi2 | 53.155(16)  | Rh4-Bi3-Bi1 | 57.300(17) | Rh3-Bi3-Bi1 | 97.169(18) |
| Rh2-Bi3-Bi1               | 51.257(15) | Bi2-Bi3-Bi1 | 72.975(11)  | Rh3-Bi4-Rh4 | 68.33(2)   | Rh3-Bi4-Rh1 | 110.42(2)  |
| Rh4-Bi4-Rh1               | 110.47(2)  | Rh3-Bi4-Bi1 | 100.089(18) | Rh4-Bi4-Bi1 | 58.525(17) | Rh1-Bi4-Bi1 | 53.434(15) |
| Rh3-Bi4-Bi2               | 58.927(18) | Rh4-Bi4-Bi2 | 97.435(19)  | Rh1-Bi4-Bi2 | 52.212(17) | Bi1-Bi4-Bi2 | 73.468(11) |

**Table S2** Selected bond distances and bond angles of the cluster anion  $\{\text{Bi}_3[\text{Rh}(\text{COD})]_3\}^{2-}$  (2).

| <b>Bond distances (Å)</b> |             |             |           |             |           |             |           |
|---------------------------|-------------|-------------|-----------|-------------|-----------|-------------|-----------|
| Bi1-Rh1                   | 2.7549(2)   | Bi1-Rh2     | 2.7559(2) | Bi1-Rh3     | 2.7641(2) | Bi2-Rh3     | 2.8885(3) |
| Bi2-Rh1                   | 2.9079(2)   | Bi3-Rh2     | 2.7276(2) | Bi3-Rh3     | 2.7437(2) | Bi3-Rh1     | 2.7598(2) |
| Bi1-Bi2                   | 2.96867(19) | Bi2-Bi3     | 2.9592(2) | Rh1-Rh2     | 2.9316(3) | Rh2-Rh3     | 2.9383(3) |
| Rh1-C15                   | 2.131(3)    | Rh1-C11     | 2.145(3)  | Rh1-C12     | 2.163(3)  | Rh1-C16     | 2.168(3)  |
| Rh2-C22                   | 2.138(3)    | Rh2-C26     | 2.144(3)  | Rh2-C21     | 2.146(3)  | Rh2-C25     | 2.152(3)  |
| Rh3-C32                   | 2.139(3)    | Rh3-C36     | 2.142(3)  | Rh3-C31     | 2.152(3)  | Rh3-C35     | 2.168(3)  |
| C11-C12                   | 1.410(4)    | C15-C16     | 1.416(4)  | C21-C22     | 1.409(4)  | C25-C26     | 1.415(4)  |
| C31-C32                   | 1.415(4)    | C35-C36     | 1.422(4)  |             |           |             |           |
| <b>Bond angles (°)</b>    |             |             |           |             |           |             |           |
| Rh1-Bi1-Rh2               | 64.278(7)   | Rh1-Bi1-Rh3 | 92.450(7) | Rh2-Bi1-Rh3 | 64.322(7) | Rh1-Bi1-Bi2 | 60.933(5) |
| Rh2-Bi1-Bi2               | 96.089(7)   | Rh3-Bi1-Bi2 | 60.387(6) | Rh3-Bi2-Rh1 | 86.866(7) | Rh3-Bi2-Bi3 | 55.947(6) |
| Rh1-Bi2-Bi3               | 56.111(5)   | Rh3-Bi2-Bi1 | 56.297(6) | Rh1-Bi2-Bi1 | 55.902(5) | Bi3-Bi2-Bi1 | 79.513(6) |
| Rh2-Bi3-Rh3               | 64.964(7)   | Rh2-Bi3-Rh1 | 64.582(7) | Rh3-Bi3-Rh1 | 92.788(8) | Rh2-Bi3-Bi2 | 96.925(7) |
| Rh3-Bi3-Bi2               | 60.723(6)   | Rh1-Bi3-Bi2 | 61.004(5) | Bi1-Rh1-Bi3 | 86.855(7) | Bi1-Rh1-Bi2 | 63.166(6) |
| Bi3-Rh1-Bi2               | 62.885(6)   | Bi1-Rh1-Rh2 | 57.876(6) | Bi3-Rh1-Rh2 | 57.178(6) | Bi2-Rh1-Rh2 | 93.677(8) |
| Bi3-Rh2-Bi1               | 87.473(7)   | Bi3-Rh2-Rh1 | 58.241(6) | Bi1-Rh2-Rh1 | 57.846(6) | Bi3-Rh2-Rh3 | 57.782(6) |
| Bi1-Rh2-Rh3               | 57.974(6)   | Rh1-Rh2-Rh3 | 85.516(8) | Bi3-Rh3-Bi1 | 86.992(7) | Bi3-Rh3-Bi2 | 63.331(6) |
| Bi1-Rh3-Bi2               | 63.317(6)   | Bi3-Rh3-Rh2 | 57.255(6) | Bi1-Rh3-Rh2 | 57.703(6) | Bi2-Rh3-Rh2 | 93.940(8) |



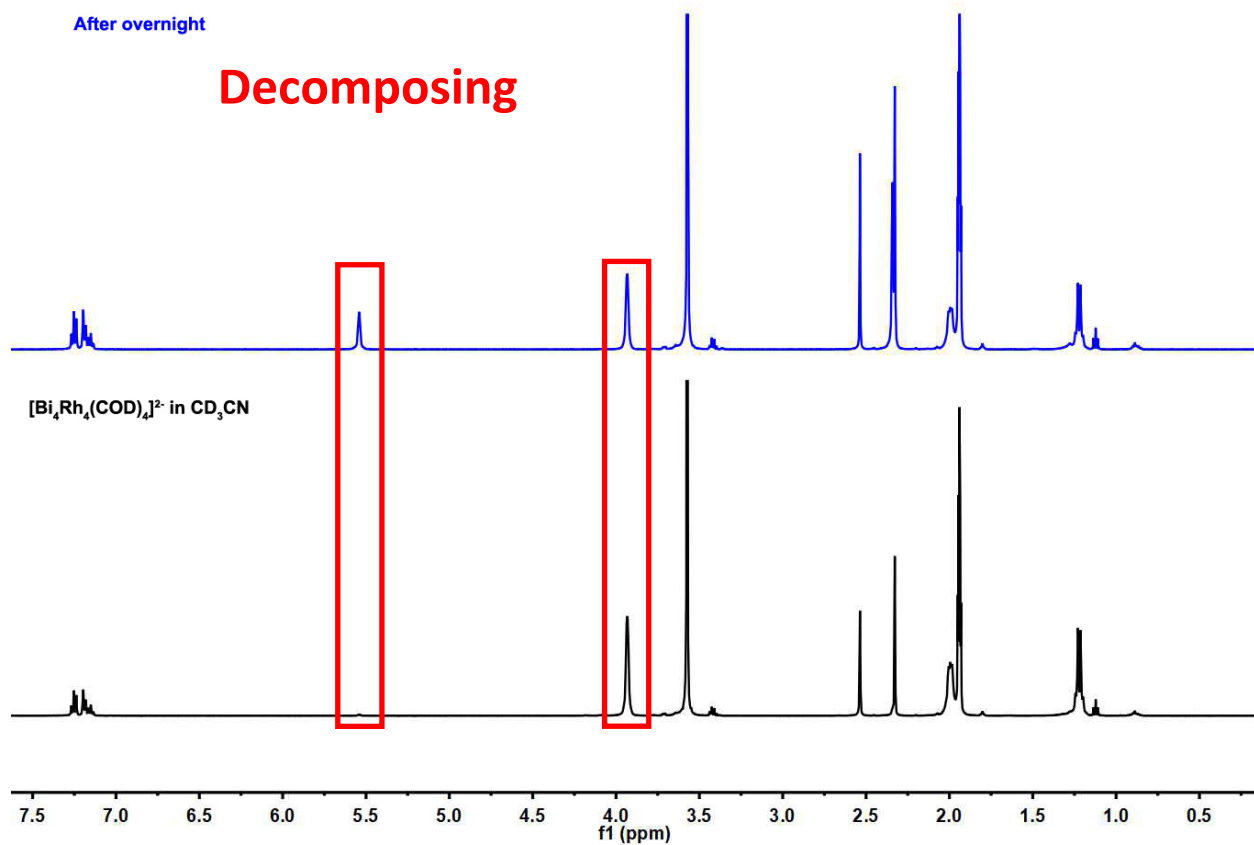

**Figure S9**  $^1\text{H}$  NMR of the crystal of the anion  $\{\text{Bi}_4[\text{Rh}(\text{COD})]_4\}^{2-}$  in  $\text{CD}_3\text{CN}$  after overnight.

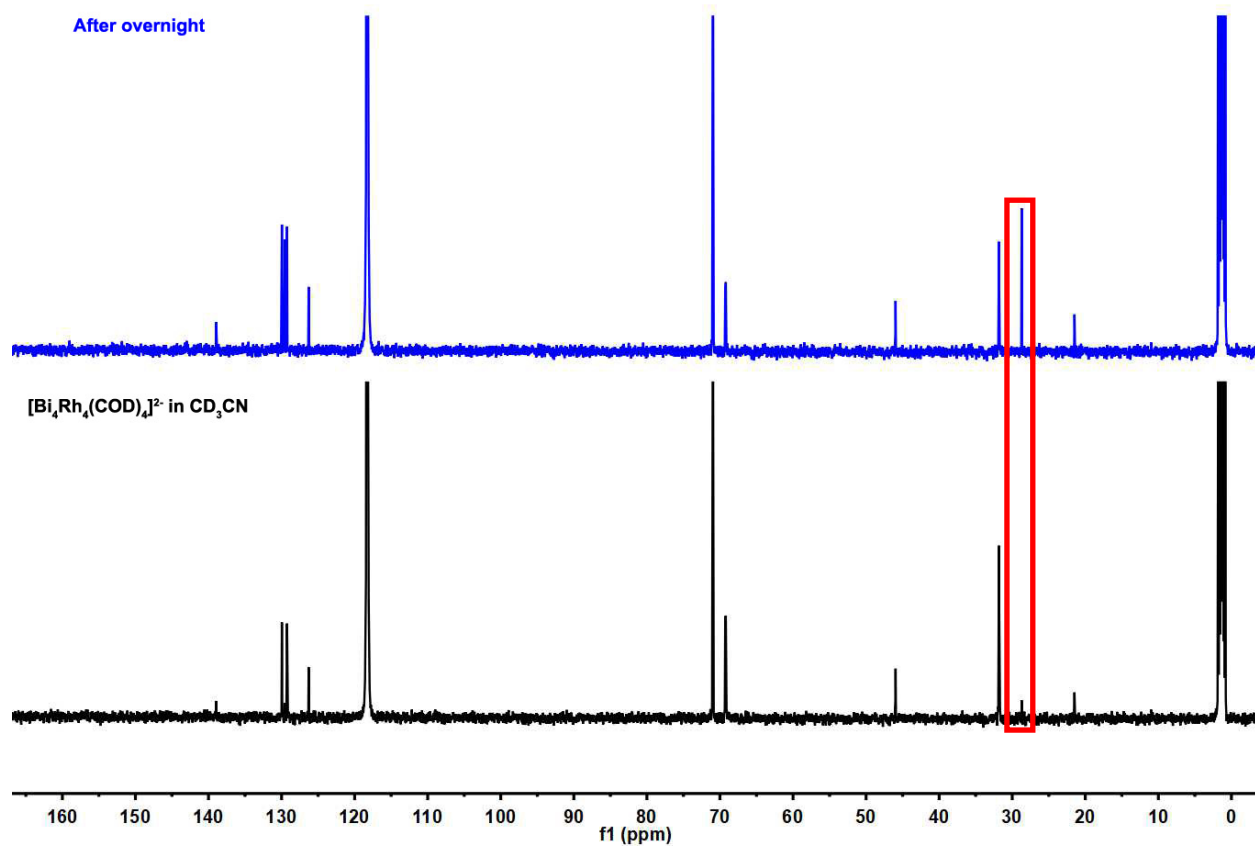

**Figure S10**  $^{13}\text{C}$  NMR of the crystal of the anion  $\{\text{Bi}_4[\text{Rh}(\text{COD})_4]_4\}^{2-}$  in  $\text{CD}_3\text{CN}$  after overnight.

**Table S3** Elemental analysis of the  $[\text{K}(\text{18-crown-6})]_2\{\text{Bi}_4[\text{Rh}(\text{COD})_4]\} \cdot 2\text{en} \cdot 2\text{tol}$  crystals by EDX.

| Element   | AN | series   | Net    | [wt.%]                            | [norm. wt.%]                    | [norm. at.%] | Error in % |
|-----------|----|----------|--------|-----------------------------------|---------------------------------|--------------|------------|
| Carbon    | 6  | K-series | 42636  | 20.46665                          | 18.52051                        | 39.31018     | 2.269903   |
| Oxygen    | 8  | K-series | 22062  | 35.13757                          | 31.79641                        | 50.66471     | 4.011884   |
| Potassium | 19 | K-series | 28606  | 3.819383                          | 3.456205                        | 2.253579     | 0.1404     |
| Rhodium   | 45 | L-series | 111917 | 18.73877                          | 16.95694                        | 4.200877     | 0.634115   |
| Bismuth   | 83 | L-series | 16008  | 32.34562                          | 29.26994                        | 3.570652     | 1.004609   |
|           |    |          | Sum:   | 110.508                           | 100                             | 100          |            |
|           |    |          |        | <i>theoretical: K/Rh/Bi=1/2/2</i> | <i>expt.: K/Rh/Bi=1/1.9/1.6</i> |              |            |

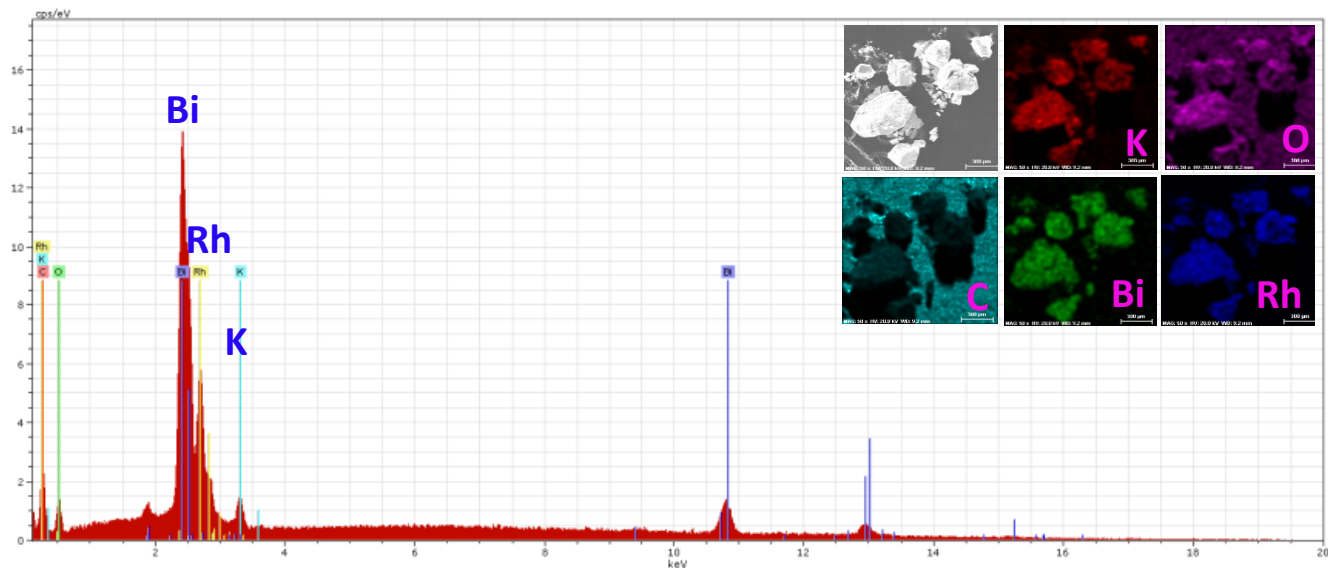

**Figure S11** SEM image and EDX analysis of the  $[K(18\text{-crown-}6)]_2[Bi_4[Rh(\text{COD})]_4] \cdot 2\text{en} \cdot 2\text{tol}$  crystals. No other elements heavier K, Bi and Rh were noticed.

**Table S4** Elemental analysis of the  $[K(2,2,2\text{-crypt})]_2[Bi_3[Rh(\text{COD})]_3] \cdot 0.5\text{en}$  crystals by EDX.

| Element                           | AN | series   | Net    | [wt.%]                          | [norm. wt.%] | [norm. at.%] | Error in % |
|-----------------------------------|----|----------|--------|---------------------------------|--------------|--------------|------------|
| Carbon                            | 6  | K-series | 304339 | 36.69238                        | 38.06458     | 65.16279     | 3.827262   |
| Oxygen                            | 8  | K-series | 31162  | 19.67499                        | 20.41078     | 26.23093     | 2.215409   |
| Potassium                         | 19 | K-series | 211598 | 7.481486                        | 7.761274     | 4.081623     | 0.251049   |
| Rhodium                           | 45 | L-series | 250828 | 11.43076                        | 11.85824     | 2.369406     | 0.396564   |
| Bismuth                           | 83 | M-series | 454124 | 21.11546                        | 21.90512     | 2.155251     | 0.762714   |
|                                   |    |          | Sum:   | 96.39508                        | 100          | 100          |            |
| <i>theoretical: K/Rh/Bi=2/3/3</i> |    |          |        | <i>expt.: K/Rh/Bi=1.9/1.1/1</i> |              |              |            |

**Table S5.** Rh-Rh bond lengths in heteroatomic polybismuth anions  $[Bi_xRh_yL_z]^{q-}$  (Å)

| $[Bi_xRh_yL_z]^{q-}$ | $\{Bi_4[Rh(\text{COD})]_4\}^{2-}$<br>(1) | $\{Bi_3[Rh(\text{COD})]_3\}^{2-}$<br>(2) | $[Bi_7Rh_3(\text{CO})_3]^{2-}$<br>Ref.7 | $[Bi@Rh_{12}(\text{CO})_{27}]^{3-}$<br>Ref.8 | $[(Bi@Rh_{12}(\text{CO})_{26})_2Bi]^{5-}$<br>Ref.8 | $[Bi@Rh_{14}(\text{CO})_{27}Bi_2]^{3-}$ Ref.8 |                       |
|----------------------|------------------------------------------|------------------------------------------|-----------------------------------------|----------------------------------------------|----------------------------------------------------|-----------------------------------------------|-----------------------|
|                      |                                          |                                          |                                         |                                              |                                                    | A-type                                        | B-type                |
| Rh-Rh                | 3.0607(10)Å<br>-3.0798(10)               | 2.9316(3)-<br>2.9383(3)                  | 2.9925(16)-<br>3.0318(16)               | 2.8119(6)-<br>3.0792(6)                      | 2.8050(17)-3.188(3)                                | 2.754(4)-<br>3.117(4)                         | 2.761(4)-<br>3.170(5) |
| Rh-Rh (av.)          | 3.0702                                   | 2.9349                                   | 3.009(1)                                | 2.9832                                       | 2.9703                                             | 2.968                                         | 2.962                 |

References:

7. Z. Li, D. Ouyang and L. Xu, *Chem. Commun.*, 2019, **55**, 6783-6786.

8. C. Femoni, G. Bussoli, I. Ciabatti, M. Ermini, M. Hayatifar, M. C. Iapalucci, S. Ruggieri and S. Zacchini, *Inorg. Chem.*, 2017, **56**, 6343-6351.

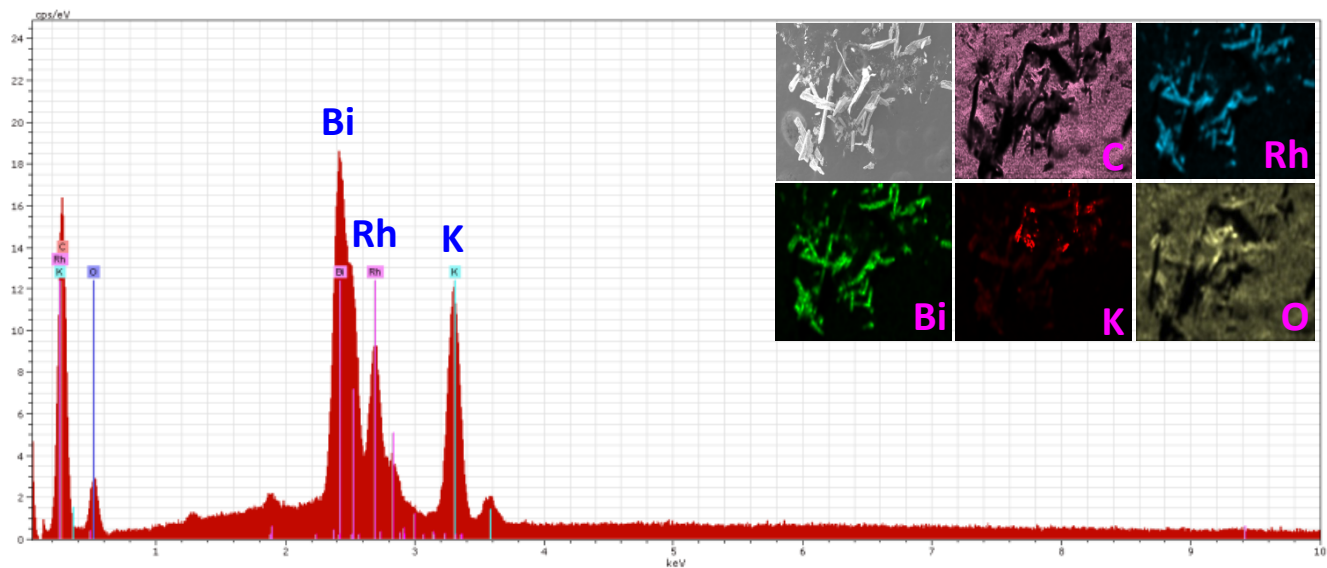

**Figure S12** SEM image and EDX analysis of the  $[K(2,2,2\text{-crypt})]_2[Bi_3[Rh(COD)]_3] \cdot 0.5en$  crystals. No other elements heavier K, Bi and Rh were noticed.

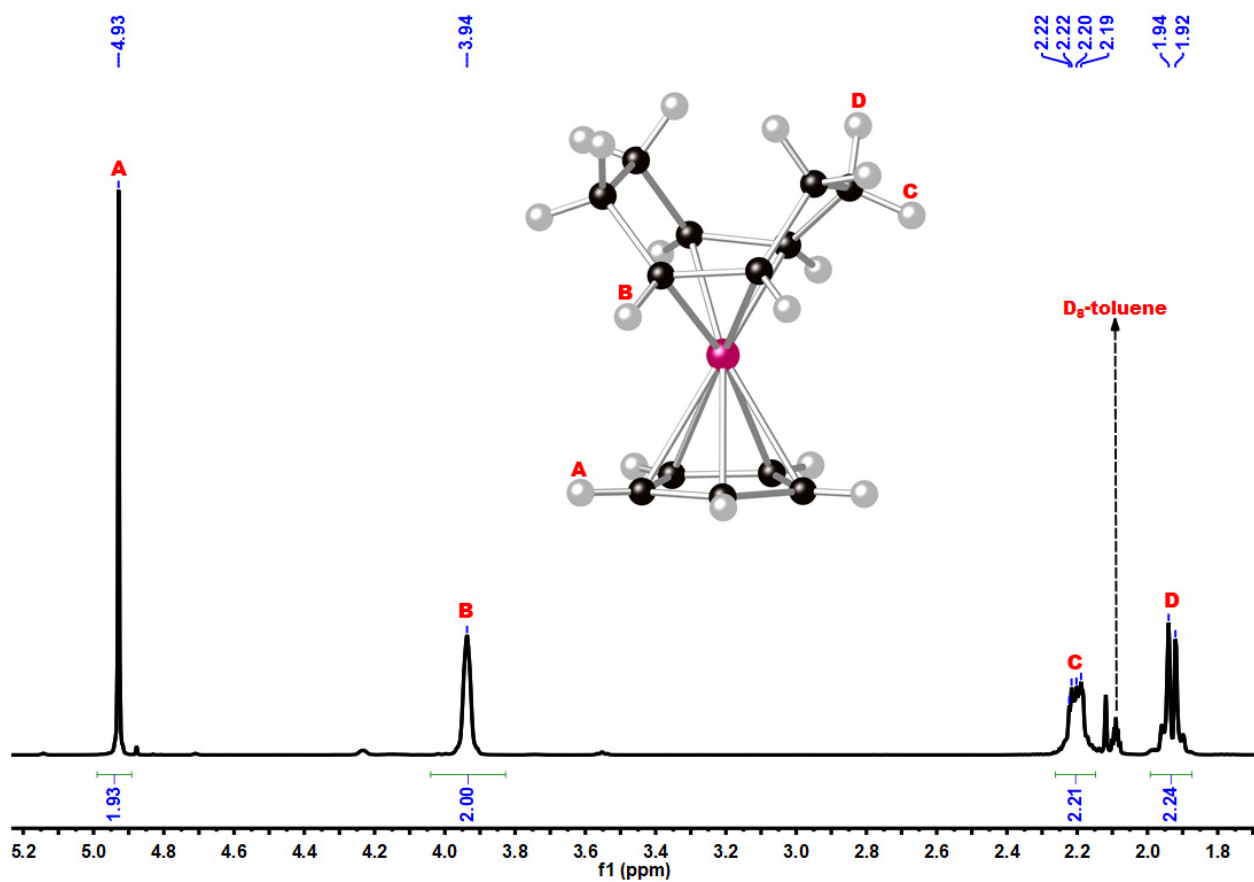

**Figure S13**  $^{13}C$  NMR of  $CpRh(COD)$  in  $D_8$ -toluene at room temperature, with all H atoms being labeled.

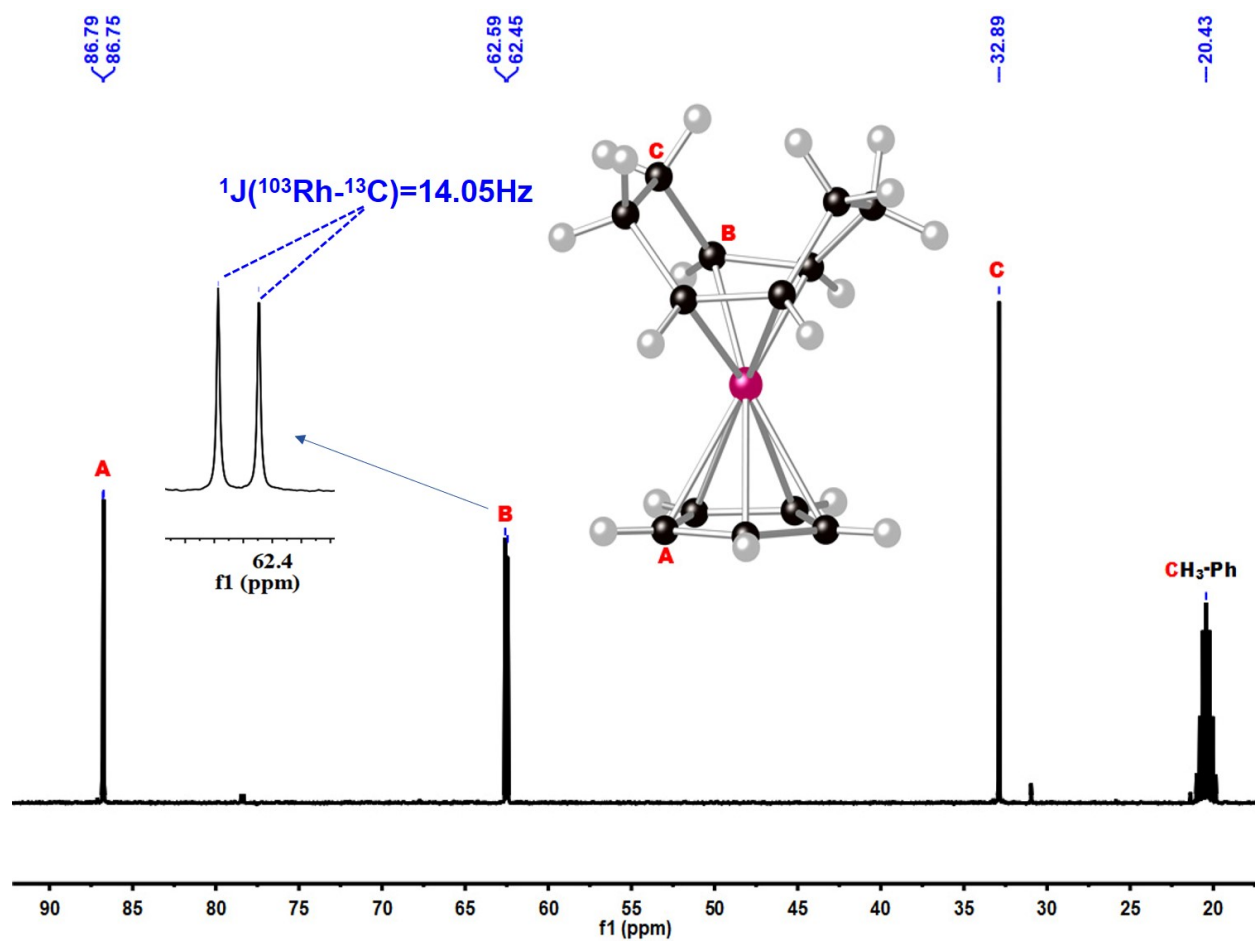

**Figure S14**  $^{13}\text{C}$  NMR of  $\text{CpRh}(\text{COD})$  in  $\text{D}_8$ -toluene at room temperature, with all C atoms being labeled.

**Table S6** Selected Crystallographic, Data Collection, and Refinement Data for [K(18-crown-6)]<sub>2</sub>1•2en•2tol and [K(2,2,2-crypt)]<sub>2</sub>•0.5en.<sup>a</sup>

|                                                                                      |                                                                                                |                                                                                                                |
|--------------------------------------------------------------------------------------|------------------------------------------------------------------------------------------------|----------------------------------------------------------------------------------------------------------------|
| Identification code                                                                  | GDOU01                                                                                         | GDOU02                                                                                                         |
| Empirical formula                                                                    | C <sub>37</sub> H <sub>64</sub> Bi <sub>2</sub> KN <sub>2</sub> O <sub>6</sub> Rh <sub>2</sub> | C <sub>61</sub> H <sub>112</sub> Bi <sub>3</sub> K <sub>2</sub> N <sub>5</sub> O <sub>12</sub> Rh <sub>3</sub> |
| Formula weight                                                                       | 1295.78                                                                                        | 2121.42                                                                                                        |
| Temperature/K                                                                        | 150(2)                                                                                         | 150(2)                                                                                                         |
| Crystal system                                                                       | monoclinic                                                                                     | triclinic                                                                                                      |
| Space group                                                                          | P2 <sub>1</sub>                                                                                | P-1                                                                                                            |
| <i>a</i> /Å                                                                          | 13.6378(7)                                                                                     | 10.8655(6)                                                                                                     |
| <i>b</i> /Å                                                                          | 17.7192(9)                                                                                     | 14.0066(8)                                                                                                     |
| <i>c</i> /Å                                                                          | 17.8331(9)                                                                                     | 24.6791(14)                                                                                                    |
| $\alpha$ /°                                                                          | 90                                                                                             | 85.315(2)                                                                                                      |
| $\beta$ /°                                                                           | 92.0637(9)                                                                                     | 77.690(2)                                                                                                      |
| $\gamma$ /°                                                                          | 90                                                                                             | 84.060(2)                                                                                                      |
| Volume/Å <sup>3</sup>                                                                | 4306.6(4)                                                                                      | 3643.0(4)                                                                                                      |
| <i>Z</i>                                                                             | 4                                                                                              | 2                                                                                                              |
| $\rho_{\text{cal}}$ cg/cm <sup>3</sup>                                               | 1.999                                                                                          | 1.934                                                                                                          |
| $\mu$ /mm <sup>-1</sup>                                                              | 9.040                                                                                          | 2.771                                                                                                          |
| <i>F</i> (000)                                                                       | 2492.0                                                                                         | 2062.0                                                                                                         |
| Crystal size/mm <sup>3</sup>                                                         | 0.39 × 0.27 × 0.18                                                                             | 0.20 × 0.12 × 0.09                                                                                             |
| Radiation                                                                            | MoK $\alpha$ ( $\lambda$ = 0.71073)                                                            | synchrotron ( $\lambda$ = 0.41328)                                                                             |
| 2 $\theta$ range for data collection/°                                               | 3.696 to 59.996                                                                                | 2.522 to 33.84                                                                                                 |
| Index ranges                                                                         | -18 ≤ <i>h</i> ≤ 19, -24 ≤ <i>k</i> ≤ 24, -24 ≤ <i>l</i> ≤ 25                                  | 15 ≤ <i>h</i> ≤ 15, -19 ≤ <i>k</i> ≤ 19, -34 ≤ <i>l</i> ≤ 34                                                   |
| Reflections collected                                                                | 43747                                                                                          | 131105                                                                                                         |
| Independent reflections                                                              | 24120 [ <i>R</i> <sub>int</sub> = 0.0329, <i>R</i> <sub>sigma</sub> = 0.0650]                  | 20698 [ <i>R</i> <sub>int</sub> = 0.0576, <i>R</i> <sub>sigma</sub> = 0.0406]                                  |
| Data/restraints/parameters                                                           | 24120/1130/1110                                                                                | 20698/13/776                                                                                                   |
| Goodness-of-fit on <i>F</i> <sup>2</sup>                                             | 1.000                                                                                          | 1.000                                                                                                          |
| <i>R</i> <sub>1</sub> / <i>wR</i> <sub>2</sub> [ <i>I</i> ≥ 2 $\sigma$ ( <i>I</i> )] | 0.0357, 0.0652                                                                                 | 0.0230, 0.0536                                                                                                 |
| <i>R</i> <sub>1</sub> / <i>wR</i> <sub>2</sub> [all data]                            | 0.0499, 0.0682                                                                                 | 0.0261, 0.0547                                                                                                 |
| Largest diff. peak/hole /eÅ <sup>-3</sup>                                            | 2.13/-1.14                                                                                     | 2.50/-2.01                                                                                                     |
| CCDC number                                                                          | 2220838                                                                                        | 2220839                                                                                                        |

<sup>a</sup>See the Crystallographic Studies Section for details on the refinement
